# Supplementary material
Source: HighWire-hosted journal article supplement (https://bmjopen.bmj.com/content/8/8/e021642)
Supplement: inline-supplementary-material-1 [file inline-supplementary-material-1.pdf]

**Supplemental Figure 1. Kaplan-Meier Analysis of PPS in patients stratified by duration of TTP:  
Cohorts A (A) and B (B)**

**A. Cohort A**

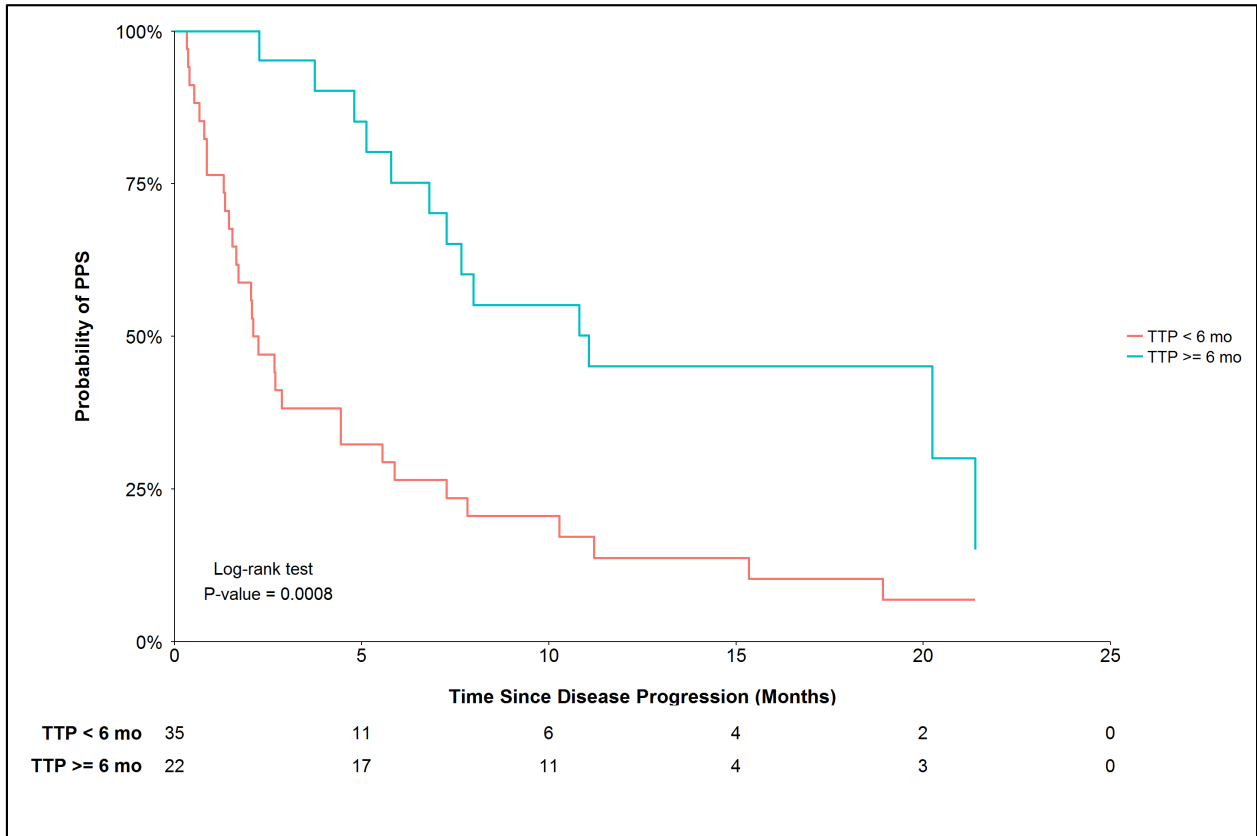

## B. Cohort B

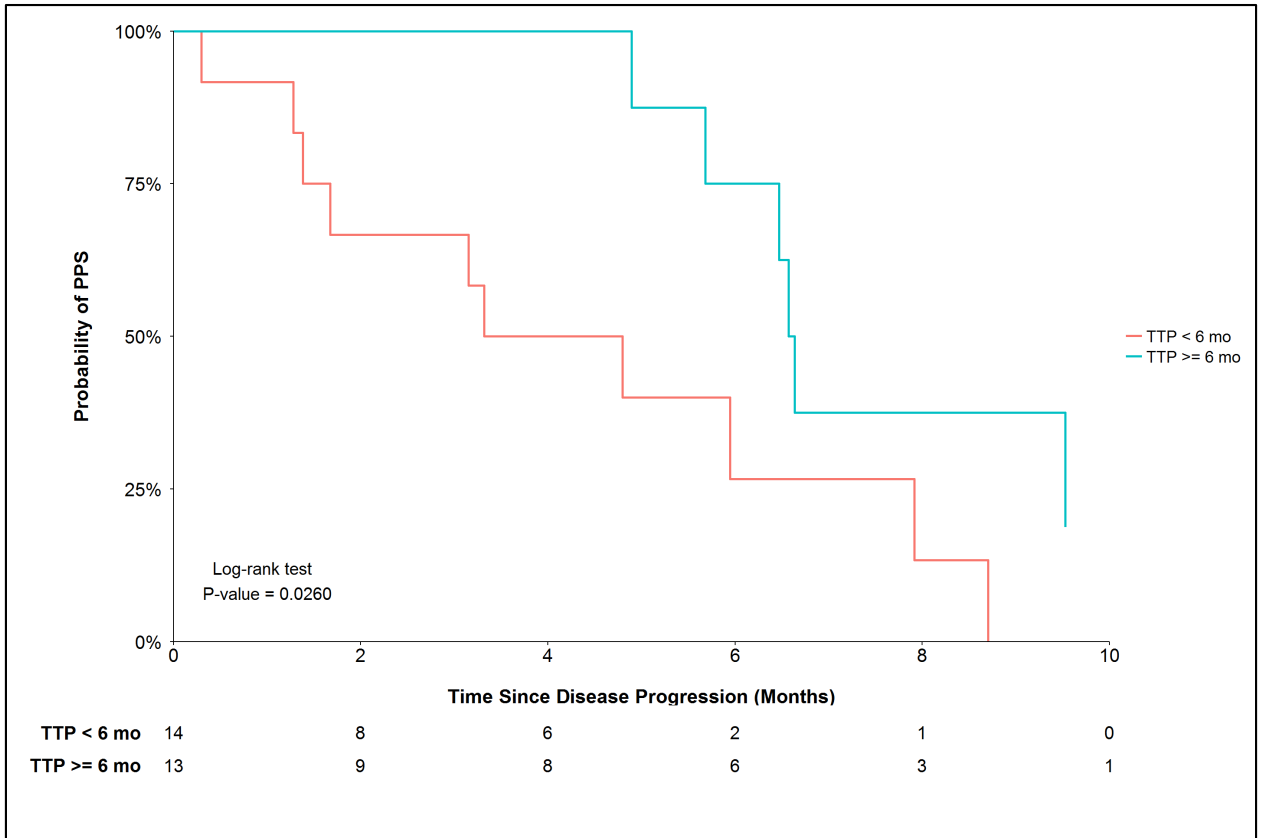

### Legend

Abbreviations: PPS = post-progression survival; TTP = time to progression.

**Supplemental Figure 2. Kaplan-Meier Analysis of PPS in patients stratified by duration of TTP: Landmark Analysis (excluding patients who died/were censored prior to 3 months follow-up)**

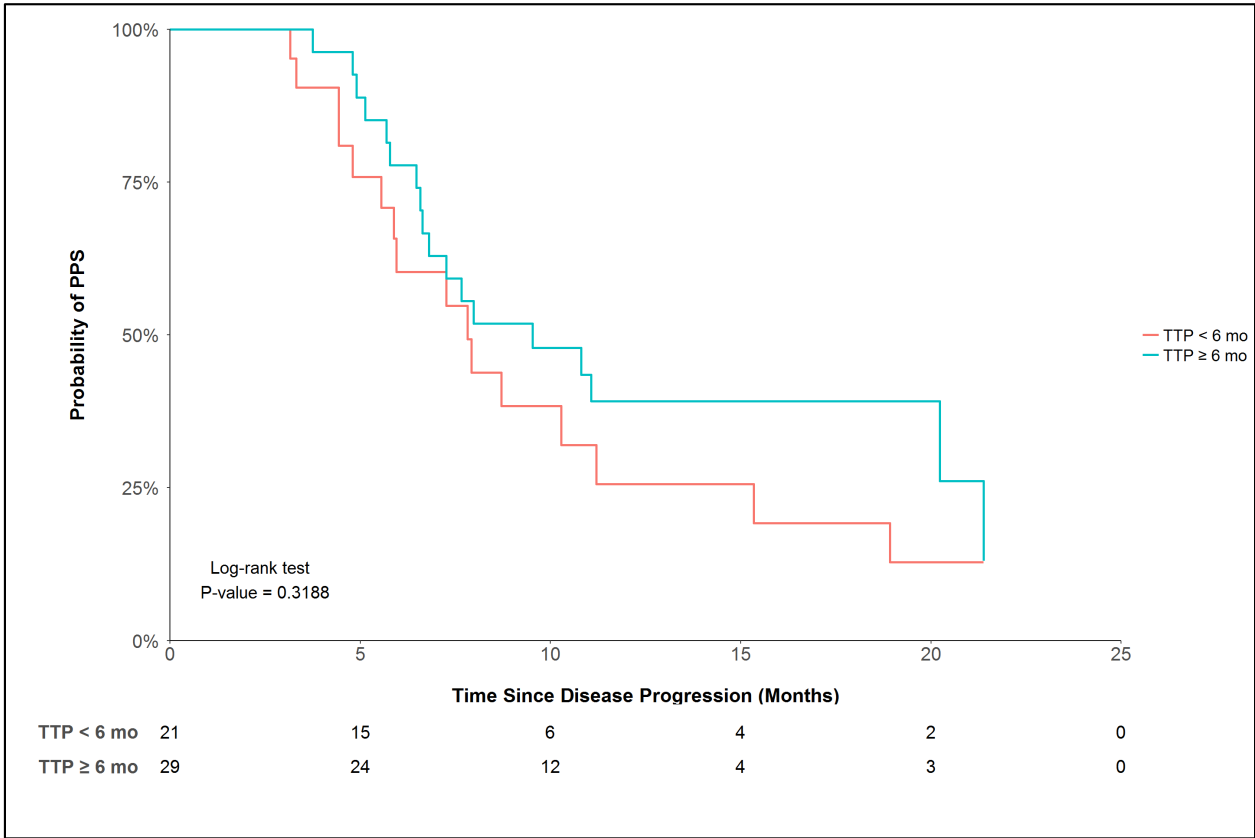

**Legend**

Abbreviations: PPS = post-progression survival; TTP = time to progression.

**Supplemental Table 1. Status of Patients Excluded from the Analysis who did not Experience Disease Progression**

| <b>Patient Status, N (%)</b>       | <b>Combined Cohort<br/>N = 51</b> | <b>Cohort A<br/>N = 21</b> | <b>Cohort B<br/>N = 30</b> |
|------------------------------------|-----------------------------------|----------------------------|----------------------------|
| <b>Censored, follow-up ended</b>   | 14 (27.5)                         | 11 (52.4)                  | 3 (10.0)                   |
| <b>Censored, follow-up ongoing</b> | 28 (54.9)                         | 6 (28.6)                   | 22 (73.3)                  |
| <b>Died</b>                        | 9 (17.6)                          | 4 (19.0)                   | 5 (16.7)                   |

**Caption**

Abbreviations: N = number.

**Supplementary Table 2. Summary of Patient Characteristics: Cohorts A and B**

| <b>Patient characteristic</b>                                                               | <b>Cohort A</b> | <b>Cohort B</b> |
|---------------------------------------------------------------------------------------------|-----------------|-----------------|
|                                                                                             | <b>N = 57</b>   | <b>N = 27</b>   |
| <b>Demographics, N (%)</b>                                                                  |                 |                 |
| Age < 65 years                                                                              | 27 (47.4)       | 14 (51.9)       |
| Male                                                                                        | 29 (50.9)       | 13 (48.1)       |
| Race (White) <sup>i</sup>                                                                   | 43 (75.4)       | 24 (88.9)       |
| <b>History of tobacco use, N (%)</b>                                                        |                 |                 |
| Current or former smoker                                                                    | 34 (59.6)       | 19 (70.4)       |
| <b>Disease and treatment characteristics,</b>                                               |                 |                 |
| ECOG performance status score >1 before or at progression, N (%)                            | 12 (21.1)       | 2 (7.4)         |
| Time since diagnosis to study treatment initiation (months), mean ± SD                      | 22.1 ± 20.0     | 21.0 ± 15.9     |
| <b>Prior anti-cancer therapy, N (%)</b>                                                     |                 |                 |
| Number of prior systemic regimens for metastatic disease >1                                 | 27 (47.4)       | 11 (40.7)       |
| Radiotherapy                                                                                | 22 (38.6)       | 7 (25.9)        |
| Maintenance therapy                                                                         | 11 (19.3)       | 8 (29.6)        |
| <b>Response to the most recent prior therapy for metastatic disease, N (%)<sup>ii</sup></b> |                 |                 |
| Complete or partial response                                                                | 11 (19.3)       | 7 (25.9)        |

**Caption**

Abbreviations: ECOG = Eastern Cooperative Oncology Group; mg = milligrams; N = number; SD = standard deviation.

Notes:

<sup>i</sup> Other reported races included Asian, Black or African American, and Mixed.

<sup>ii</sup> Response to the most recent prior anti-cancer therapy included complete response, partial response, stable disease, and progressive disease. Seven patients in Cohort A (including one patient with a non-

evaluable response) and one patient in Cohort B had an unknown response. These patients were imputed as non-complete or partial responders.

**Supplemental Table 3. Summary of PPS, Stratified by Duration of TTP: Cohorts A and B**

| <b>Cohort</b>   | <b>N</b> | <b>Number of post-progression deaths</b> | <b>Median PPS (months)</b> | <b>95% CI</b> |
|-----------------|----------|------------------------------------------|----------------------------|---------------|
| <i>Cohort A</i> |          |                                          |                            |               |
| TTP ≥ 6 months  | 22       | 13                                       | 11.1                       | (6.8-21.4)    |
| TTP < 6 months  | 35       | 31                                       | 2.2                        | (1.4-4.4)     |
| <i>Cohort B</i> |          |                                          |                            |               |
| TTP ≥ 6 months  | 13       | 6                                        | 6.6                        | (4.9-NR)      |
| TTP < 6 months  | 14       | 10                                       | 4.1                        | (1.3-7.9)     |

**Caption**

Abbreviations: CI = confidence interval; N = number; NR = not reached; PPS = post-progression survival; TTP = time to progression.

**Supplementary Table 4. Summary of Patient Characteristics in Landmark Analysis (excluding patients who died/were censored prior to 3 months follow-up)**

| <b>Patient characteristic</b>                                                               | <b>Total<br/>N = 50</b> | <b>Time to progression<br/>≥ 6 months<br/>N = 29</b> | <b>Time to progression<br/>&lt; 6 months<br/>N = 21</b> | <b>P-value</b> |
|---------------------------------------------------------------------------------------------|-------------------------|------------------------------------------------------|---------------------------------------------------------|----------------|
| <b>Demographics, N (%)</b>                                                                  |                         |                                                      |                                                         |                |
| Age < 65 years                                                                              | 20 (40.0%)              | 10 (34.5%)                                           | 10 (47.6%)                                              | 0.52           |
| Male                                                                                        | 20 (40.0%)              | 12 (41.4%)                                           | 8 (38.1%)                                               | 1.00           |
| Race (White) <sup>i</sup>                                                                   | 39 (78.0%)              | 24 (82.8%)                                           | 15 (71.4%)                                              | 0.54           |
| <b>History of tobacco use, N (%)</b>                                                        |                         |                                                      |                                                         |                |
| Current or former smoker                                                                    | 27 (54.0%)              | 13 (44.8%)                                           | 14 (66.7%)                                              | 0.21           |
| <b>Disease and treatment characteristics</b>                                                |                         |                                                      |                                                         |                |
| ECOG performance status before or at progression > 1, N (%)                                 | 3 (6.0%)                | 1 (3.4%)                                             | 2 (9.5%)                                                | 0.77           |
| Time since diagnosis to study treatment initiation (month), mean ± SD                       | 23.1 ± 17.3             | 22.3 ± 16.8                                          | 24.1 ± 18.4                                             | 0.81           |
| <b>Prior anti-cancer therapy, N (%)</b>                                                     |                         |                                                      |                                                         |                |
| Number of prior systemic regimens for metastatic disease > 1                                | 23 (46.0%)              | 11 (37.9%)                                           | 12 (57.1%)                                              | 0.29           |
| Radiotherapy                                                                                | 16 (32.0%)              | 8 (27.6%)                                            | 8 (38.1%)                                               | 0.63           |
| Maintenance therapy                                                                         | 14 (28.0%)              | 8 (27.6%)                                            | 6 (28.6%)                                               | 1.00           |
| <b>Response to the most recent prior therapy for metastatic disease, N (%)<sup>ii</sup></b> |                         |                                                      |                                                         |                |
| Complete or partial response                                                                | 12 (24.0%)              | 5 (17.2%)                                            | 7 (33.3%)                                               | 0.33           |

**Caption**

Abbreviations: ECOG = Eastern Cooperative Oncology Group; N = number; SD = standard deviation.

Notes:

<sup>i</sup> Other reported races included Asian, Black or African American, and Mixed.

<sup>ii</sup> Response to the most recent prior anti-cancer therapy included complete response, partial response, stable disease, and progressive disease.



**Supplementary Table 5. The Multivariable Cox Model of the Association between TTP and PPS in the Combined Cohort: Landmark Analysis (excluding patients who died/were censored prior to 3 months follow-up)**

| <b>Combined Cohort</b>                                                                             |           |               |          |
|----------------------------------------------------------------------------------------------------|-----------|---------------|----------|
|                                                                                                    | <b>HR</b> | <b>95% CI</b> | <b>P</b> |
| <b>Time to progression in 3-month increment(s)</b>                                                 | 0.84      | (0.63-1.13)   | 0.242    |
| <b>Age &lt; 65 years</b> Yes vs. No                                                                | 1.46      | (0.59-3.61)   | 0.411    |
| <b>Male</b> Yes vs. No                                                                             | 0.59      | (0.25-1.41)   | 0.236    |
| <b>Race (White)</b> Yes vs. No                                                                     | 1.17      | (0.31-4.41)   | 0.814    |
| <b>Current or former smoker</b> Yes vs. No                                                         | 1.25      | (0.46-3.41)   | 0.662    |
| <b>ECOG performance status before or at progression &gt; 1</b> Yes vs. No                          | 6.50      | (1.02-41.50)  | 0.048 *  |
| <b>Time since diagnosis to study treatment initiation in 1-month increment(s)</b>                  | 0.97      | (0.94-1.01)   | 0.115    |
| <b>Number of prior systemic regimens for metastatic disease &gt; 1</b> Yes vs. No                  | 1.69      | (0.56-5.16)   | 0.355    |
| <b>Prior radiotherapy</b> Yes vs. No                                                               | 0.90      | (0.37-2.18)   | 0.809    |
| <b>Prior maintenance therapy</b> Yes vs. No                                                        | 0.44      | (0.16-1.22)   | 0.114    |
| <b>Complete or partial response to most recent prior therapy for metastatic disease</b> Yes vs. No | 0.56      | (0.20-1.59)   | 0.279    |

**Caption**

Abbreviations: CI = confidence interval; ECOG = Eastern Cooperative Oncology Group; HR = hazard ratio; PPS = post-progression survival; TTP = time to progression. \* $p < 0.05$
